# Supplementary material for: TRAUCO, a Trithorax-group gene homologue, is required for early embryogenesis in Arabidopsis thaliana
Source: PubMed Central journal article supplement — J Exp Bot. 2010 Jan 29;61(4):1215–24. doi: 10.1093/jxb/erp396 (PMC2826662; doi:10.1093/jxb/erp396), 2010-01-29

**TRAUCO, a Trithorax-group gene homologue, is required for early embryogenesis in *Arabidopsis thaliana*.** Felipe Aquea, Amal J. Johnston, Paola Cañon, Ueli Grossniklaus and Patricio Arce-Johnson.

## **SUPPLEMENTARY DATA**

**Supplementary Figure 1.** (a) Diagram of putative T-DNA insertions deduced from PCR genotyping. Black arrows show primers used. (b) PCR genotyping of *tro-1* plant. Lane L-LT, PCR amplification with specific primer L and left border T-DNA primer; Lane R-LT, PCR amplification with specific primer R and left border T-DNA primer; Lane RT, PCR amplification with left border and right border T-DNA primers. Lane R-RT, PCR amplification with specific primer T and right border T-DNA primer. (c) Identification of 5' T-DNA insertion site. PCR product of lane L-LT shown in (b) was sequenced. T-DNA sequence is shown in red and TRO sequence shown in black. T-DNA insertion was at nucleotide 1232. (d) Identification of 3' T-DNA insertion site. PCR product of lane R-LT shown in (b) was sequenced. T-DNA sequence is shown in red and TRO sequence shown in black. This insertion was at nucleotide 1256, which lead to deletion of a sequence that is shown in blue.

**Supplementary Figure 2. Loss of TRO function does not affect pollen viability.** Alexander's staining was performed with wild type (a and b) and heterozygous *tro-1/+* mutant (c and d) anthers. In these bright-field images, wild-type and *tro-1* viable pollen grains show intense purple staining in the cytoplasm.

**Supplementary Figure 3.** Subcellular localization of TRO-GFP *in vivo*. (a) Localization of GFP-Lti6b protein, (b) Localization of TRO-GFP. Propidium iodide was used as a red counterstain in (b).

Supplementary figure 1

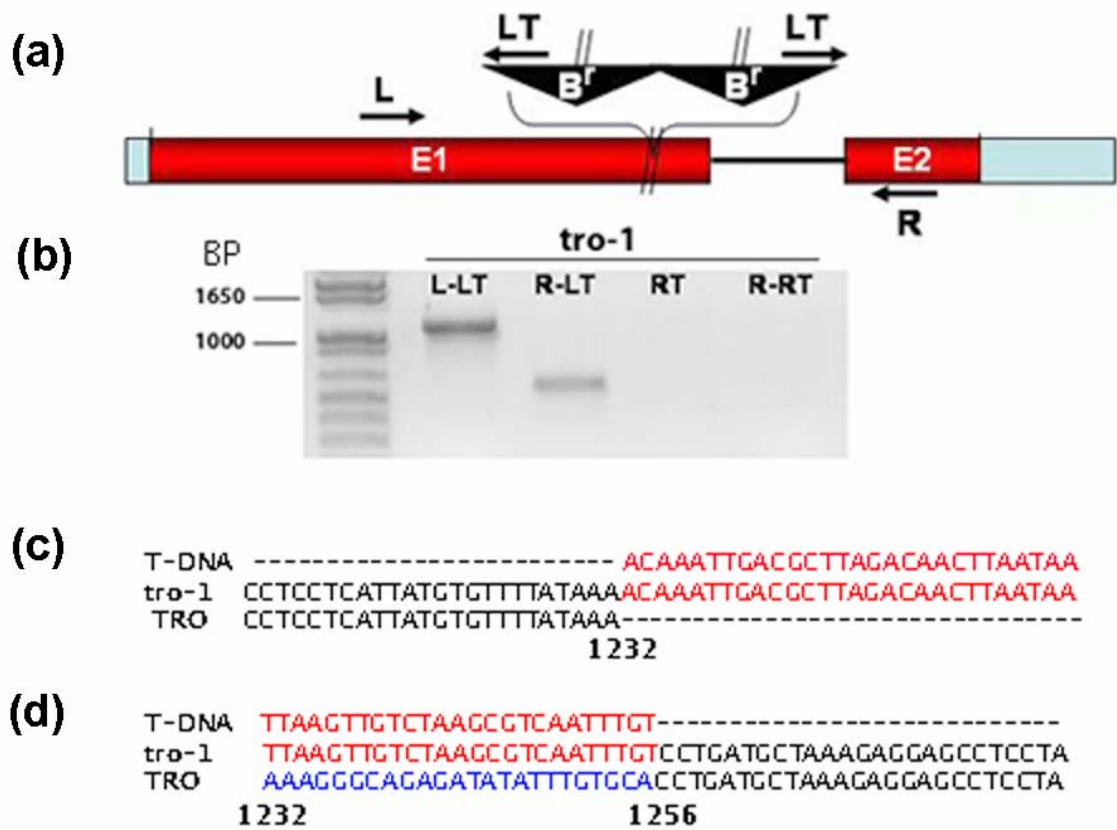

Supplementary figure 2

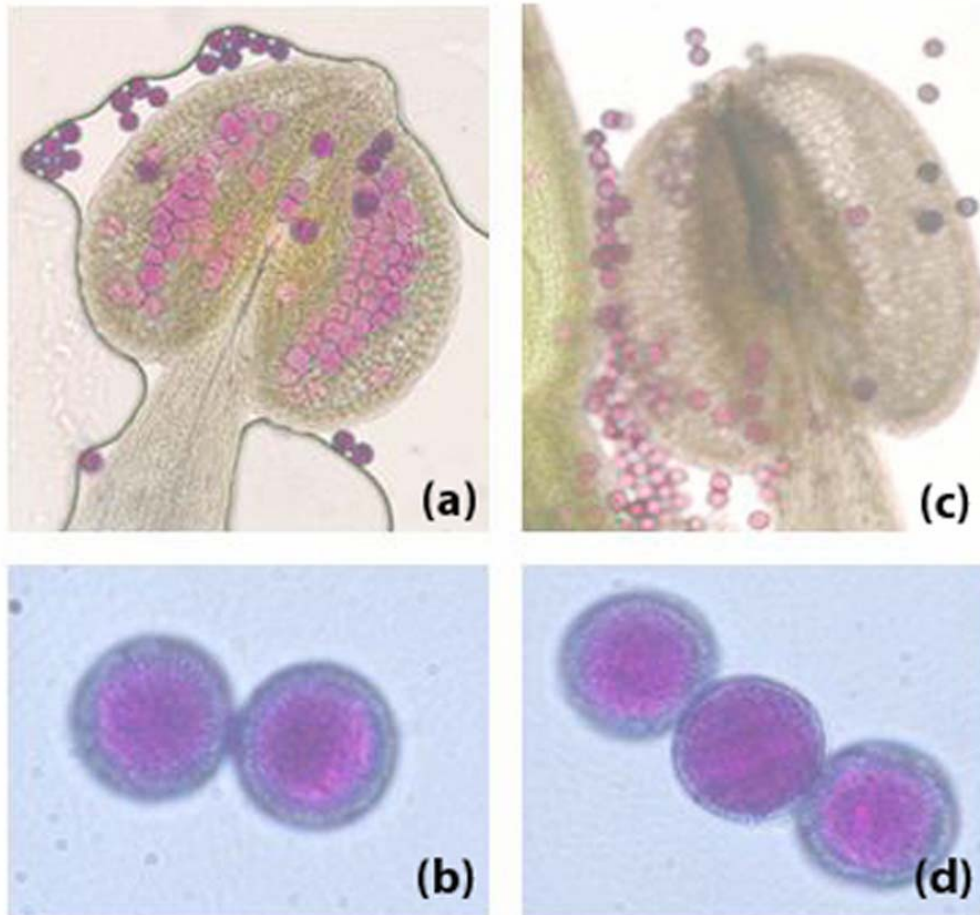

Supplementary figure 3

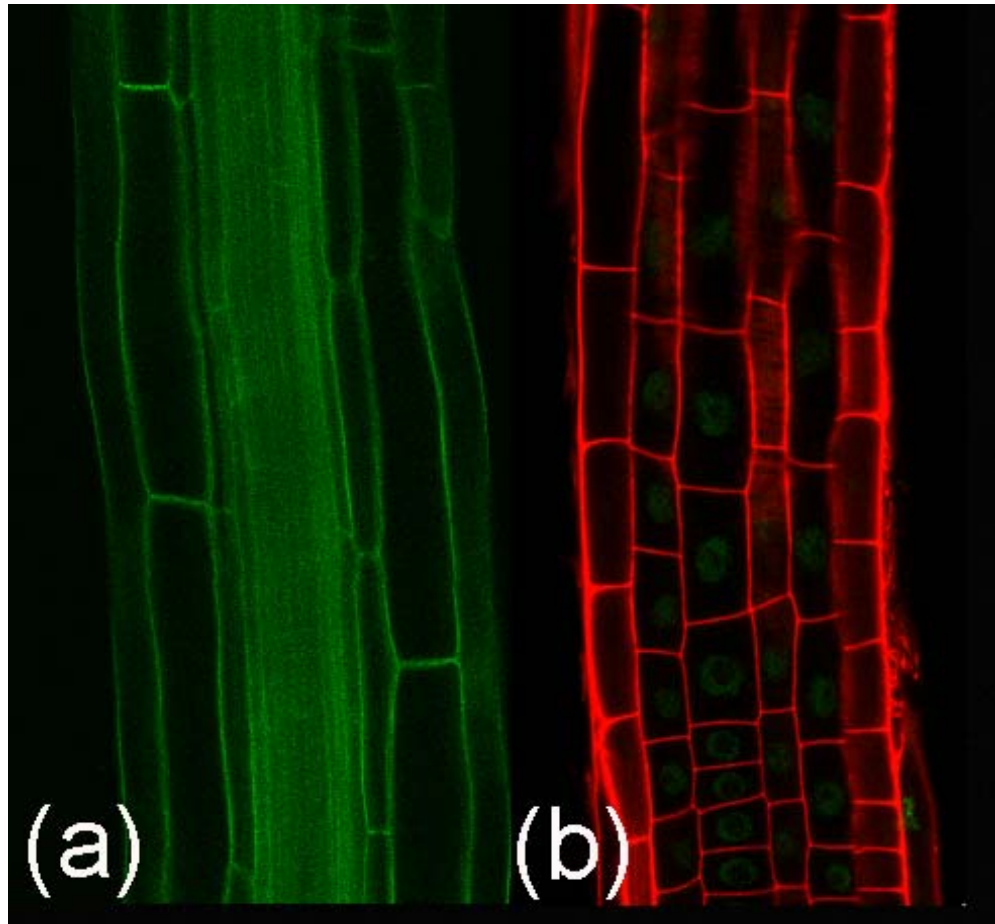

Supplement: erp396_1.pdf [file erp396_1.pdf]
